## Review Article

# Ion channels as convergence points in the pathology of pulmonary arterial hypertension

 Thibault R. H. Jouen-Tachoire<sup>1,2,3</sup>,  Stephen J. Tucker<sup>1,3</sup> and  Paolo Tammaro<sup>2,3</sup>

<sup>1</sup>Clarendon Laboratory, Department of Physics, University of Oxford, Parks Road, Oxford OX1 3PU, U.K.; <sup>2</sup>Department of Pharmacology, University of Oxford, Mansfield Road, OX1 3QT Oxford, U.K.; <sup>3</sup>OXION Initiative in Ion Channels and Disease, University of Oxford, OX1 3PT Oxford, U.K.

**Correspondence:** Paolo Tammaro (paolo.tammaro@pharm.ox.ac.uk) or Stephen J. Tucker (stephen.tucker@physics.ox.ac.uk)

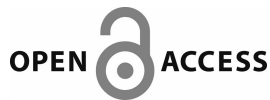

Pulmonary arterial hypertension (PAH) is a fatal disease of the cardiopulmonary system that lacks curative treatments. The main pathological event in PAH is elevated vascular resistance in the pulmonary circulation, caused by abnormal vasoconstriction and vascular remodelling. Ion channels are key determinants of vascular smooth muscle tone and homeostasis, and four PAH channelopathies (*KCNK3*, *ABCC8*, *KCNA5*, *TRPC6*) have been identified so far. However, the contribution of ion channels in other forms of PAH, which account for the majority of PAH patients, has been less well characterised. Here we reason that a variety of triggers of PAH (e.g. *BMPR2* mutations, hypoxia, anorectic drugs) that impact channel function may contribute to the onset of the disease. We review the molecular mechanisms by which these ‘extrinsic’ factors converge on ion channels and provoke their dysregulation to promote the development of PAH. Ion channels of the pulmonary vasculature are therefore promising therapeutic targets because of the modulation they provide to both vasomotor tone and proliferation of arterial smooth muscle cells.

## Introduction

Pulmonary arterial hypertension (PAH) is a progressive disease of the cardiopulmonary system with life-limiting consequences. PAH is defined by a mean pulmonary artery pressure above 25 mmHg at rest, and end-expiratory pulmonary artery wedge pressure of less than 15 mmHg. Disease factors include: (i) genetic origins (i.e. mutations in genes crucial for pulmonary vascular function); (ii) other pathologies including congenital heart disease, portal hypertension, HIV or COPD; (iii) drugs or toxins, or (iv) unknown factors (i.e. PAH of idiopathic origins) [1]. In all cases, a complex pathological cascade leads to narrowing and remodelling of arteries and/or increased vascular reactivity ultimately leading to increased vascular resistance and elevated pulmonary blood pressure which may precipitate in right heart failure and death [1]. The development of PAH-specific therapies significantly improved patients’ outcome and quality of life [2]. However, poor prognosis (57% five-year survival rate), resistance to current drugs, and lack of curative treatment means there is an unmet need for new and innovative targets in PAH pharmacotherapy [2].

Ion channels have an important homeostatic function whereby they regulate the resting membrane potential and cytoplasmic  $[Ca^{2+}]$  of pulmonary arterial smooth muscle cells (PASMC), which is a key determinant of vasoconstriction and vascular cell proliferation [3,4]. Therefore, the dual involvement of ion channels in the control of arterial tone and remodelling makes them potential key mediators in the pathogenic cascade of PAH, which can be therapeutically targeted. Supporting this view is the notion that mutations in ion channel genes may lead to hereditary forms of PAH [4,5]. Ion channel dysregulation may also be secondary to alterations in the cellular environment that take place during PAH, and thus contribute to worsening of the condition [6,7]. We therefore suggest that dysregulation of ion channels could be a convergence point in PAH pathogenesis, independent of the pathological trigger.

Received: 23 June 2021

Revised: 15 July 2021

Accepted: 16 July 2021

Version of Record published:  
4 August 2021

Here we examine the pathophysiological roles of ion channels in PAH, and how their dysfunction, either directly caused by genetic alterations in ion channel genes ('intrinsic' dysregulation) or secondary to altered cellular microenvironment ('extrinsic' factors), can lead to PAH. Since a range of recent reviews has covered the pathophysiology of PAH channelopathies [4,5], we primarily focus this review on the extrinsic factors (e.g. hypoxia, endothelial dysfunction, drugs, HIV) that contribute to dysfunction of plasmalemmal channels in PSMCs during PAH.

## Overview of channelopathies in PAH

A range of *de novo* and heritable mutations in PSMC ion channels have been implicated in familiar forms of PAH, these include mutations in the *KCNK3*, *ABCC8*, *KCNA5* and *TRPC6* genes. [4]

The TWIK-related acid-sensitive K<sup>+</sup> (TASK) channels belong to the superfamily of Two-Pore Domain K<sup>+</sup> (K2P) channels [8]. The TASK1 (*KCNK3*) channel is responsible for the background I<sub>KN</sub> leak current that contributes to the resting membrane potential, vasomotor tone as well as proliferation of PSMCs [7,9]. So far, 12 loss-of-function missense mutations were identified in *KCNK3*, which was the first channelopathy discovered in PAH [5]. The lack of 'protective' heterodimerisation with TASK3 appears to underlie the lung-specific phenotype of *KCNK3* mutations [10]. Several *in vivo* studies confirmed that TASK1 loss-of-function precedes haemodynamic changes and is sufficient to cause PAH [7,9].

ATP-sensitive K<sup>+</sup> (K<sub>ATP</sub>) channels promote hyperpolarisation and vasodilation in vascular smooth muscle cells [11]. Recently, 23 loss-of-function mutations in *ABCC8* (encoding the regulatory SUR1 subunit) were found in PAH patients [5,12]. These heterozygous mutations appear to impair channel trafficking and/or affect ATP sensitivity [13]. Several paradoxes surround this second PAH channelopathy, such as the lack of congenital hyperinsulinism, or the observation that patients with Cantú syndrome, with gain-of-function mutations in Kir6.1 and SUR2 subunits, also exhibit pulmonary hypertension [14]. The role of K<sub>ATP</sub> in the pulmonary circulation therefore remains to be clarified.

In the pulmonary vasculature voltage-gated K<sup>+</sup> (K<sub>v</sub>) channels also regulate the resting membrane potential, Ca<sup>2+</sup> influx and vasoconstriction as well as cellular apoptosis, migration and proliferation [3,15]. Strong lines of evidence support a causal role for Kv1.5 dysfunction in PAH [16]. Sequencing of idiopathic PAH (IPAH) patients identified a number of mutations in the promoter and coding regions of *KCNA5* believed to affect its transcription, trafficking, and interaction with its β subunits [17,18]. A new variant has also been found in Pulmonary Hypertension of the Newborn (PPHN) [19]

Transient Receptor Potential Canonical (TRPC) channels are a subfamily of non-selective cation channels, which represent a major alternative route of Ca<sup>2+</sup> entry outside voltage-gated Ca<sup>2+</sup> channels, by functioning as both store-operated (SOC) and receptor-operated (ROC) channels [20]. Pharmacological blockade and knock-out experiments found a strong correlation between TRPC6 expression, capacitative Ca<sup>2+</sup> entry, resting cytoplasmic [Ca<sup>2+</sup>], vascular tone and proliferation of rat PSMCs [21]. In PAH, increased TRPC6 expression promotes vasoconstriction and neomuscularisation of pulmonary arteries [22]. A genotypic analysis found that the 254(C → G) single nucleotide polymorphism (SNP) was 2.85 times more common in IPAH patients [23]. It is of interest that another mutation in *TRPC6* (F443I) was recently found to associate with PPHN [19].

## Extrinsic dysregulation of ion channels in PAH

Individuals with mutations in ion channels represent a minority of PAH patients, whereas dysregulation of ion channels is also observed in patients with other forms of PAH [6,7,24]. PAH can be induced by a wide variety of triggers, giving rise to different classifications (Table 1) [1]. In this section, the involvement of ion channels in the various forms of PAH is examined (Figure 1).

### Germline mutations

#### BMPR2

Signalling events involving the transforming growth factor-β (TGFβ) family, in particular bone morphogenetic proteins (BMP), are an important regulator of PSMC homeostasis. More than 806 loss-of-function variants in bone morphogenetic protein receptor type II (BMPR2) have been identified, which account for 75% and 25% of heritable PAH (HPAH) and IPAH cases, respectively [24,25].

Several lines of evidence link BMP signalling to regulation of K<sup>+</sup> channels in PSMC. Indeed, BMP2 up-regulates the expression of α subunits through Mothers Against Decapentaplegic Homologues (SMADs),

**Table 1 Clinical classification of PAH**

|                                                                              |
|------------------------------------------------------------------------------|
| 1. Pulmonary arterial hypertension (PAH)                                     |
| 1.1 Idiopathic PAH (IPAH)                                                    |
| 1.2 Heritable/familial PAH (HFAH)                                            |
| 1.2.1 <i>BMPR2</i> mutations                                                 |
| 1.2.2 Other mutations (e.g. <i>KCNK3</i> , <i>CAV1</i> )                     |
| 1.3 Drug-induced PAH (DPAH) (e.g. fenfluramine)                              |
| 1.4 PAH Associated with comorbidities (APAH)                                 |
| 1.4.1 Connective tissue disease (e.g. systemic sclerosis)                    |
| 1.4.2 Human immunodeficiency virus (HIV) infection                           |
| 1.4.3 Portal hypertension                                                    |
| 1.4.4 Congenital heart disease                                               |
| 1.4.5 Schistosomiasis                                                        |
| 1'. Pulmonary veno-occlusive disease and/or pulmonary capillary haemangiomas |
| 1''. Persistent pulmonary hypertension of the newborn (PPHN)                 |

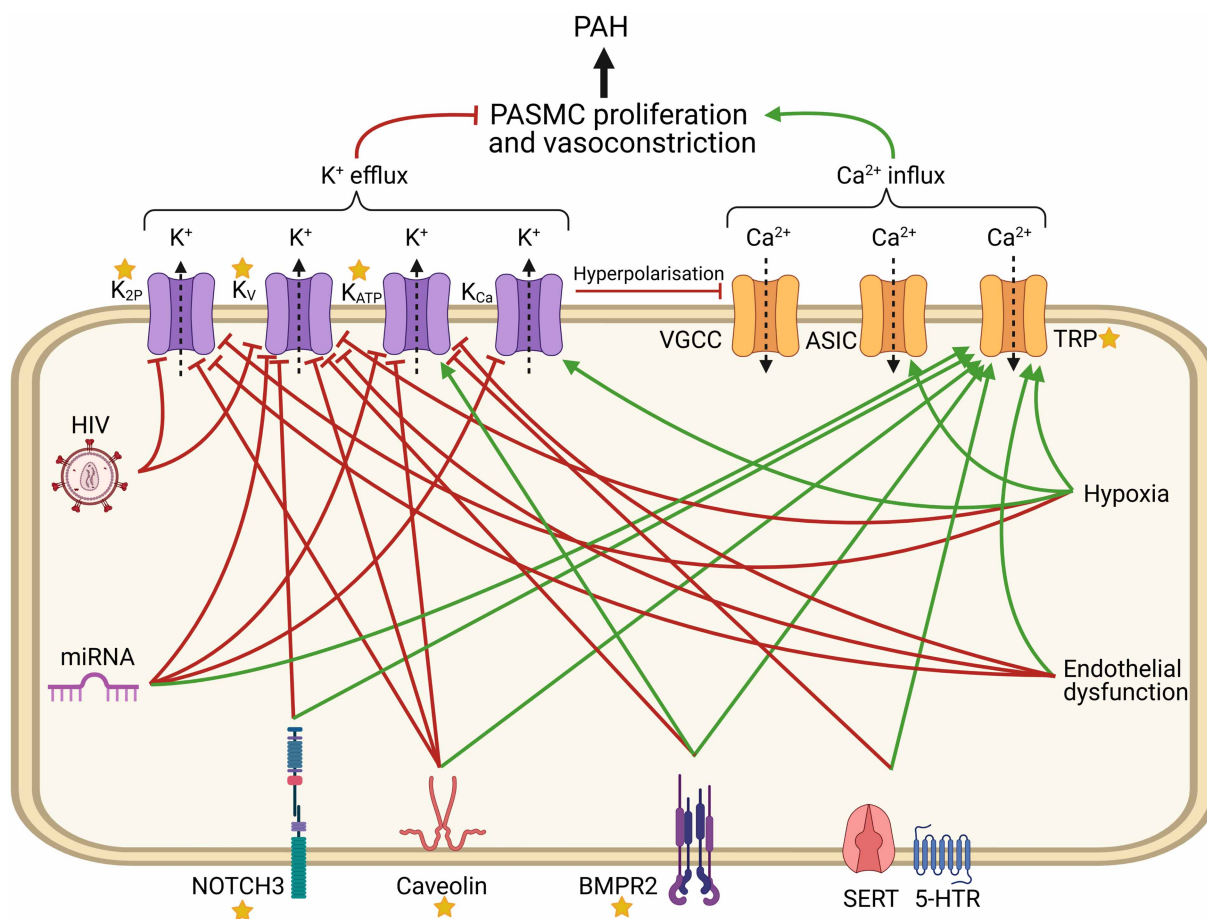

**Figure 1. Dysregulation of PASM ion channels during PAH.**

Red lines represent inhibitory influences vs activation for green arrows. Stars represent proteins with mutations associated with PAH.

while decreasing the expression of inhibitory  $\beta$  and  $\gamma$  subunits in human PASMCM [26]. In a murine model of PAH, *BMPR2* loss-of-function reduced Kv1.5 expression, and resulted in increased voltage-gated  $\text{Ca}^{2+}$  entry and vasoconstriction [27]. Additive effects between *BMPR2* and *KCNA5* mutations may underlie the earlier age of onset and higher disease severity in digenic patients, suggesting that mutational load and the presence of ‘second hits’ is important in PAH progression [28]. *BMPR2* deletion was also shown to down-regulate TASK1 and promote vasoconstriction in rat PASMCM, although in this case modulation appears to be transcription-independent, but instead due to altered channel trafficking [25]. *ABCC8* mRNA expression was also up-regulated in lung biopsies obtained from *BMPR2* patients [29].

*BMPR2* mutations also promote the formation of atypical heteromeric BMP receptors, shifting BMP signalling towards non-canonical MAPK-dependent pathways in murine PASMCMs [30,31]. This shift is important, as *BMP2* was shown to inhibit the expression of TRPC1/4/6 channels and proliferation of proximal rat PASMCMs, whereas *BMP4* up-regulated TRPC1/4/6 expression and distal PASMCMs proliferation via non-canonical cascade PASMCMs [32,33]. Overall, *BMPR2* haploinsufficiency favours the formation of different BMP receptor complexes, suppressing the canonical, pro-apoptotic *BMP2*/SMAD signalling in proximal PASMCMs, and potentiating the non-canonical, pro-proliferative *BMP4*/p38 axis in distal human PASMCMs (Figure 2) [34,35].

### Caveolin

The scaffolding protein caveolin is a structural component of caveolae, which are specialised dynamic lipid rafts important for microdomain functional coupling [36]. For instance, in the pulmonary vasculature, the caveolin ‘signalplex’ regulates arterial vasoconstriction by interacting with  $\text{Ca}^{2+}$  regulatory molecules [36]. Several mutations that decrease caveolin-1 (*CAV1*) expression were found in PAH, and *CAV1* knock-out in animal models leads to pulmonary hypertension [37,38]. Contrary to the loss of expression in pulmonary endothelium, *CAV1* expression is up-regulated in rat PASMCMs and promotes proliferation [39]. Caveolin-1 directly influences the kinetics, assembly and regulation of several vascular channels via its scaffolding domain. For instance, binding of caveolins to Kir6.1, Kv1.5 and TASK1 reduced their functional activity in heterologous expression systems [40–42]. Caveolin-1 is also a positive regulator of TRPC assembly and SOCE in mice pulmonary vascular cells [43]. Increased caveolin expression in PASMCMs of two rat models of PAH (chronic hypoxia and monocrotaline) was found to enhance agonist-induced SOCE/ROCE and vasoconstriction in pulmonary arteries [44].

### NOTCH3

The transmembrane NOTCH3 receptor controls the differentiation of PASMCMs from proliferative to contractile phenotype [45]. Three genetic variants in *NOTCH3* were linked to PAH [19,46]. Clinical studies found a causative role for the overexpression of NOTCH3 in the abnormal proliferation of PASMCMs in PAH [47,48]. NOTCH3 enhanced  $\text{Ca}^{2+}$  entry in human PASMCMs by (i) up-regulating TRPC6-dependent SOCE and (ii) inhibiting Kv1.2/Kv1.5 activity, which in turn promotes voltage-gated  $\text{Ca}^{2+}$  entry [45,49]. The resulting increased  $\text{Ca}^{2+}$  mobilisation leads to PAH by preferentially promoting vascular remodelling [47]. The fact that some of these effects were transcription-independent hints that non-canonical signalling of NOTCH3 may be involved in this pathological process [45,49]. Indeed, the two NOTCH3 missense mutations were shown to boost proliferative signalling of NOTCH3, despite actually decreasing its downstream transcriptional activity [46]. The NOTCH intracellular domain (NICD) has also been proposed to directly influence ion channel activity [45,49].

### Epigenetics

MicroRNAs (miRNAs) are small non-coding RNAs that regulate gene expression by binding and silencing the translation of target mRNAs. Several studies have shown a correlation between dysregulation of miRNAs, altered ionic currents and dysfunction of rat and human pulmonary artery *in vivo*. For example, the Kv1.2, Kv1.5, Kv7.5, BKCa $\beta$ 1 and TASK1 channels are under direct negative control of miR-1, miR-23b-3p, miR-29b, miR-138, miR-190, miR-206 and miR-222, whose up-regulation in PAH (e.g. 4-fold for miR-1) decreased channel expression in human and rodent PASMCMs, and promoted membrane depolarisation and arterial wall hypertrophy [50–52]. In addition, down-regulation of miR-135a-5p increased TRPC1 expression and promoted PASMCM proliferation [53]. miRNAs are promising diagnostic markers of PAH, as well as potential therapeutic targets to correct ion channel dysfunction in PAH.

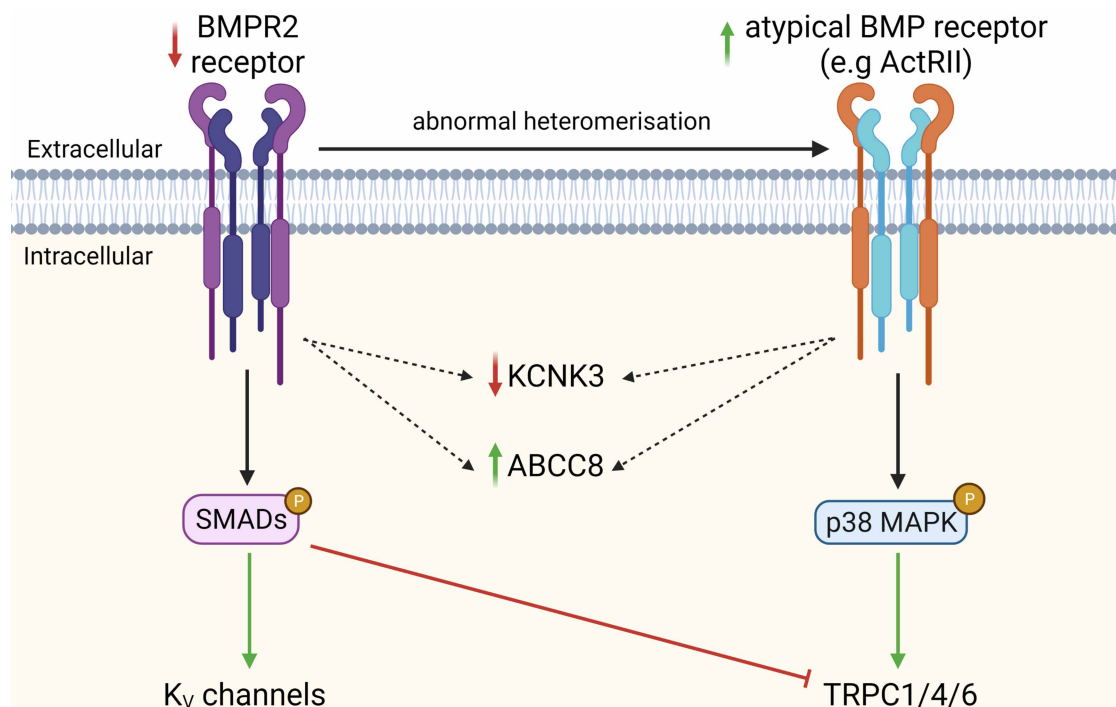

**Figure 2. Consequences of shift from canonical BMPR2 to non-canonical BMP signalling on ion channel function in PSMCs.**

Continuous arrows denote inhibition/down-regulation (red) or activation/up-regulation (green). Dotted arrows represent undefined links. 'P' denotes phosphorylated, activated mediator. MAPK, mitogen-activated protein kinase; ActRII, activin type 2 receptor.

## Comorbidities and PAH

### HIV

PAH is one of the most severe complications of HIV infection and a major cause of mortality in HIV-PAH patients, leading to a lower survival rate compared with other PAH patients [54]. HIV infection increases the incidence of PAH by 2500-fold in human subjects [54], and can trigger PAH in some laboratory animals (rats and macaques, but not mice) [55–57]. Two studies showed that HIV transgenes down-regulated the  $I_{KN}$  and  $I_{KV}$  currents (decreased Kv1.5, Kv7.1 and Kv7.4 expression) in rodent pulmonary arteries, possibly contributing to membrane depolarisation [55,57]. The Vpu protein of HIV-1 shares a high homology with the N-terminal of TASK1 channel, and it promotes abnormal oligomerisation of Vpu and TASK1 subunits, which leads to their degradation in heterologous expression systems [58]. The connection between HIV and PAH remains to be determined, one question being why only a small proportion (8.3%) of HIV patients have PAH.

### Hypoxia

Hypoxia is a known trigger of pulmonary hypertension and ion channels are essential mediators of the hypoxic pulmonary vasoconstriction (HPV) [59]. The inhibition of Kv1.5 and Kv2.1 channels in the small resistance pulmonary arteries is a major contributor of HPV [15,60], but the underlying regulatory mechanisms remain controversial [61,62]. Although redox signalling is a key component of HPV, the extent of changes in the level of reactive oxygen species (ROS) during hypoxia are not fully defined, and both a decrease and an increase in ROS were shown to inhibit Kv channel opening [61]. The molecular mechanisms of oxygen sensing in PSMCs are also not fully defined. Mitochondria, which produce ROS in proportion to  $PO_2$  levels, are likely involved in the PSMC response to hypoxia [62]. Cytoplasmic NADPH oxidases, which also produce ROS, reportedly lead to inhibition of Kv1.5 channel activity and modulation of channel trafficking via oxidation of C-terminal cysteine residues [63]. Also the TASK1 channel mediates an  $O_2$ -sensitive current in carotid body

cells [64]. Conversely, hypoxia down-regulated both TASK1 expression (via the RELM $\beta$ -STAT3-NFAT pathway) and activity (via the kinase Src), which promote human PASMCM proliferation and vasoconstriction [65,66].

Hypoxia led to activation of store-operated Ca<sup>2+</sup> entry (SOCE) and elevation of cytoplasmic [Ca<sup>2+</sup>] in rodent PASMCMs [67]. Mice in which the *Trpc1* and *Trpc6* genes were deleted (knockouts) had impaired hypoxic response and loss of hypoxic vasoconstriction [22]. The rise in ROS up-regulates both the expression and assembly of SOCE channels to promote Ca<sup>2+</sup> mobilisation in hypoxic PASMCMs [68,69]. There is evidence indicating that hypoxia directly modulates TRPC6 via the second messenger diacylglycerol and the enzyme AMP-activated protein kinase. Calcium Release-Activated Calcium (ORAI) channels are involved in the control of proliferation of rat PASMCMs, but their role in PAH requires further investigation [21].

The mechanisms of chronic hypoxia, more relevant to the context of PAH, may differ from those of HPV. Hypoxia-inducible factors (HIFs) are key transcription factors that contribute to remodelling of pulmonary artery during chronic hypoxia [70]. Selective down-regulation of the expression of Kv  $\alpha$  subunits (Kv1.1, Kv1.5, Kv2.1, Kv4.3, Kv9.3) in PASMCM via HIF1 $\alpha$  occurs during chronic hypoxia; this signalling pathway is abnormally potentiated by ROS during PAH [71,72]. In contrast, hypoxia increased the expression of Ca<sup>2+</sup>-activated K<sup>+</sup> (BKCa) channels in rat PASMCMs, which may explain the BKCa up-regulation seen in pulmonary arteries of PAH patients [73]. The underlying mechanism involves altered expression of the auxiliary  $\beta$ 1 subunit via HIF1 $\alpha$ , which enhances BKCa channel sensitivity to voltage and Ca<sup>2+</sup>, hence promoting PASMCM relaxation and thus constituting an endogenous protective mechanism [74].

Chronic hypoxia also selectively up-regulates a range of non-selective cation channels in PASMCMs including TRPC1 and TRPC6, via the HIF1 $\alpha$  and Notch signalling pathways, and the osmo-mechanosensitive cation channels, TRPV1/4 [75–77]. The family of acid-sensitive ion channels (ASIC) can also participate in SOCE in pulmonary vascular cells [67]. ASIC1-dependent Ca<sup>2+</sup> entry during hypoxia is independent of changes in gene expression [67], but it depends on inactivation of the inhibitory effect of H<sub>2</sub>O<sub>2</sub> on ASIC1 channel, as well as stimulation of forward trafficking via the protein RhoA [67,78]. The increase in cytoplasmic [Ca<sup>2+</sup>] in PASMCMs observed in hypoxia led to activation of transcription factor NFAT which down-regulates Kv1.5 expression and mitochondrial homeostasis, potentially hardwiring ionic dysfunction in a pathological feedback loop [79].

## 5-HT Signalling and anorectic drugs

Appetite-suppressants that potentiate serotonin signalling (e.g. fenfluramine, benfluorex) were taken off market after causing a drug-induced PAH epidemic in the 1960–70s [80]. The causal role of up-regulated 5-HT signalling in PASMCMs of PAH patients and animal models further reinforced this ‘serotonin hypothesis’ of PAH [81]. The serotonin transporter (SERT) is strongly implicated in the pathogenesis of PAH [82], and some studies have linked a gain-of-function polymorphism in SERT to an increased risk of PAH [83].

5-HT is both a potent vasoconstrictor and PASMCM mitogen, known to up-regulate TRPC1, TRPC6, TRPV4 currents in rat PASMCMs [84,85]. Anorectic drugs constrict pulmonary arteries by inhibiting Kv1.5 currents, although the underlying molecular mechanisms are not fully understood and may include direct K<sub>V</sub> channel inhibition, activation of 5-HT<sub>2</sub> receptors or internalisation by SERT [86]. The pathways downstream of the 5-HT receptor and transporter seem to converge on second messengers like ROS [87] and kinases [86], which are known modulators of ion channel activity. For instance, 5-HT triggers the endocytosis of Kv1.5 channels in PASMCM through a 5-HT<sub>2A</sub>R/tyrosine kinase/caveolin pathway [88].

## Endothelial dysfunction

The endothelium produces several vasoactive mediators that play an important role in PASMCM homeostasis. A shift towards vasoconstrictive and mitogenic endothelial signals is one of the first events in PAH. It is still unclear whether endothelial dysfunction is a cause or consequence of PAH; however a monocrotaline-induced animal model of PAH presents pulmonary endothelium dysfunction, which is targeted by current PAH therapies (e.g. endothelin receptor antagonists, prostacyclin analogues) [89]. Endothelial dysfunction is accompanied by up-regulation of endothelin-1 and down-regulation of NO and PGI<sub>2</sub> signalling [89]. These factors modulate vascular ion channels through cyclic nucleotides and protein kinases [90]. Endothelin-1 promotes depolarisation in rodent and human PASMCMs and vasoconstriction by inhibiting I<sub>KV</sub>, I<sub>KATP</sub> and up-regulating I<sub>CaCl</sub>, I<sub>BKCa</sub> and TRPC currents through the PLC/PKC pathway [90]. Endothelin-1 also inhibits TASK1 in PASMCM, which could involve both gating inhibition in TASK1 as well as its phosphorylation-dependent internalisation [91,92]. The NO/cGMP/PKG pathway promotes vasorelaxation by activating I<sub>KV</sub>, I<sub>KCa</sub>, I<sub>KN</sub>, I<sub>KATP</sub> and

inhibiting  $I_{SOCE}$  [90,93]. Likewise, the  $PGI_2/cAMP/PKA$  axis activates  $I_{Kv}$ ,  $I_{KCa}$ ,  $I_{KN}$ ,  $I_{KATP}$  and inhibits TRPC channels [90,94].

## Summary and implications for therapy

Ion channels are key determinants of the tone and the remodelling of the pulmonary artery. Over 50 genetic variants in four ion channels (*KCNK3*, *ABCC8*, *KCNA5* and *TRPC6*) have been found in PAH patients [4]. In this review, we show that ion channel dysfunction occurs in virtually in all forms of PAH (Figure 1).

A better characterisation of the regulation of ion channels in PAMSCs could provide new information about why so many different triggers (e.g. anorectic drugs, HIV, hypoxia) can all lead to PAH. Integrative ‘omic’ approaches hold hope for establishing a deep genotype-phenotype correlation of the disease. Identifying new pathways that regulate PAMSCs ion channels will be important to draw an accurate picture of their pathological relevance in the various forms of PAH (e.g. the recently proposed link between TASK1 and vitamin D deficiency) [95]. Also, the molecular mechanisms that dysregulate the Kv7 channel [96], the mechanosensitive Piezo1 channel [97] and the  $Ca^{2+}$ -activated  $Cl^-$  channel TMEM16A [98] in PAH remain poorly understood.

Multiple studies showed that activators of  $K^+$  channels [7,99] and inhibitors of both  $Cl^-$  channels [98] and TRPC channels [100] can prevent and/or reverse PAH in animal models. Optimising the selectivity, potency and lung-specific delivery of these compounds will therefore be paramount to the development of new PAH therapies. Recent advances in the determination of structures for these channel types may also expedite drug discovery efforts towards this goal

## Perspectives

- **Highlight the importance of the field:** Pulmonary arterial hypertension is a multifactorial and severe disease with no curative treatments. Vasoconstriction and arterial remodelling both contribute to elevated resistance to blood flow and increased blood pressure.
- **A summary of the current thinking:** Ion channels are involved in the control of both arterial tone and proliferation of pulmonary artery smooth muscle cells. Dysfunction of ion channels plays a causative role in PAH, and may link the different pathological triggers of PAH to the onset of the disease.
- **A comment on future directions:** Ion channels are currently under-explored targets for PAH. Understanding the regulation and pathophysiological role of ion channels in PAH will provide new avenues for therapeutic intervention.

## Acknowledgements

This work was supported by funding from the British Heart Foundation (PG/19/8/34168), the Biotechnology and Biological Sciences Research Council (BB/T007664/1 and BB/T002018/1) and the Wellcome Trust. T.J.-T. is a student on the OXION PhD Programme in Ion Channels and Disease. Figures were created with Biorender.

## Competing Interests

The authors declare that there are no competing interests associated with the manuscript.

## Open Access Statement

Open access for this article was enabled by the participation of University of Oxford in an all-inclusive Read & Publish pilot with Portland Press and the Biochemical Society under a transformative agreement with JISC.

## Author contributions

All authors were involved in writing and editing the manuscript. T.J.-T. produced the figures.

## Abbreviations

BMP, bone morphogenetic proteins; BMPR2, bone morphogenetic protein receptor type II; CAV1, caveolin-1; HIF, hypoxia-inducible factor; HPAH, heritable pulmonary arterial hypertension; HPV, hypoxic pulmonary vasoconstriction; IPAH, idiopathic pulmonary arterial hypertension;  $K_{ATP}$ , ATP-sensitive  $K^+$ ; PAH, Pulmonary arterial hypertension; PASMC, pulmonary arterial smooth muscle cells; PPHN, Pulmonary Hypertension of the Newborn; ROS, reactive oxygen species; SERT, serotonin transporter; SOCE, store-operated  $Ca^{2+}$  entry; TASK1, TWIK-Related Acid Sensitive  $K^+$  Channel 1; TRPC, Transient Receptor Potential Canonical.

## References

- Galiè, N., Humbert, M., Vachiery, J.L., Gibbs, S., Lang, I., Torbicki, A. et al. (2015) 2015 ESC/ERS guidelines for the diagnosis and treatment of pulmonary hypertension. *Eur. Respir. J.* **46**, 903–975 <https://doi.org/10.1183/13993003.01032-2015>
- Lau, E.M.T., Giannoulitou, E., Celermajer, D.S. and Humbert, M. (2017) Epidemiology and treatment of pulmonary arterial hypertension. *Nat. Rev. Cardiol.* **14**, 603–614 <https://doi.org/10.1038/nrcardio.2017.84>
- Kuhr, F.K., Smith, K.A., Song, M.Y., Levitan, I. and Yuan, J.X.J. (2012) New mechanisms of pulmonary arterial hypertension: role of  $Ca^{2+}$  signaling. *Am. J. Physiol. Heart Circ. Physiol.* **302**, 1546–1562 <https://doi.org/10.1152/ajpheart.00944.2011>
- Lambert, M., Capuano, V., Olschewski, A., Sabourin, J., Nagaraj, C., Girerd, B. et al. (2018) Ion channels in pulmonary hypertension: a therapeutic interest? *Int. J. Mol. Sci.* **19**, 3162 <https://doi.org/10.3390/ijms19103162>
- Le Ribeuz, H., Capuano, V., Girerd, B., Humbert, M., Montani, D. and Antigny, F. (2020) Implication of potassium channels in the pathophysiology of pulmonary arterial hypertension. *Biomolecules* **10**, 1261 <https://doi.org/10.3390/biom10091261>
- Liu, X.R., Zhang, M.F., Yang, N., Liu, Q., Wang, R.X., Cao, Y.N. et al. (2012) Enhanced store-operated  $Ca^{2+}$  entry and TRPC channel expression in pulmonary arteries of monocrotaline-induced pulmonary hypertensive rats. *Am. J. Physiol. Cell Physiol.* **302**, 77–87 <https://doi.org/10.1152/ajpcell.00247.2011>
- Antigny, F., Hautefort, A., Meloche, J., Belacel-Ouari, M., Manoury, B., Rucker-Martin, C. et al. (2016) Potassium channel subfamily K member 3 (KCNK3) contributes to the development of pulmonary arterial hypertension. *Circulation* **133**, 1371–1385 <https://doi.org/10.1161/CIRCULATIONAHA.115.020951>
- Bayliss, D.A., Czirájk, G., Enyedí, P., Goldstein, S.A.N., Lesage, F., Minor, Jr, D.L. et al. (2019) Two P domain potassium channels (version 2019.4) in the IUPHAR/BPS Guide to Pharmacology Database. IUPHAR/BPS Guid. to Pharmacol. CITE
- Lambert, M., Capuano, V., Boet, A., Tesson, L., Bertero, T., Nakhleh, M.K. et al. (2019) Characterization of *Kcnk3* -mutated rat, a novel model of pulmonary hypertension. *Circ. Res.* **125**, 678–695 <https://doi.org/10.1161/CIRCRESAHA.119.314793>
- Bohnen, M.S., Roman-Campos, D., Terrenoire, C., Jnani, J., Sampson, K.J., Chung, W.K. et al. (2017) The impact of heterozygous *KCNK3* mutations associated with pulmonary arterial hypertension on channel function and pharmacological recovery. *J. Am. Heart Assoc.* **6**, e006465 <https://doi.org/10.1161/JAHA.117.006465>
- Foster, M.N. and Coetzee, W.A. (2015) *KATP* channels in the cardiovascular system. *Physiol. Rev.* **96**, 177–252 <https://doi.org/10.1152/physrev.00003.2015>
- Lago-Docampo, M., Tenorio, J., Hernández-González, I., Pérez-Olivares, C., Escribano-Subías, P., Pousada, G. et al. (2020) Characterization of rare *ABCC8* variants identified in Spanish pulmonary arterial hypertension patients. *Sci. Rep.* **10**, 15135 <https://doi.org/10.1038/s41598-020-72089-1>
- Ashcroft, F.M. (2005) ATP-sensitive potassium channelopathies: focus on insulin secretion. *J. Clin. Invest.* **115**, 2047–2058 <https://doi.org/10.1172/JCI25495>
- McClenaghan, C., Woo, K.V. and Nichols, C.G. (2019) Pulmonary hypertension and ATP-sensitive potassium channels: paradigms and paradoxes. *Hypertension* **74**, 14–22 <https://doi.org/10.1161/HYPERTENSIONAHA.119.12992>
- Bonnet, S. and Archer, S.L. (2007) Potassium channel diversity in the pulmonary arteries and pulmonary veins: implications for regulation of the pulmonary vasculature in health and during pulmonary hypertension. *Pharmacol. Ther.* **115**, 56–69 <https://doi.org/10.1016/j.pharmthera.2007.03.014>
- Pozeg, Z.I., Michelakis, E.D., McMurtry, S., Thébaud, B., Wu, X.C., Dyck, J.R.B. et al. (2003) In vivo gene transfer of the  $O_2$ -sensitive potassium channel *Kv1.5* reduces pulmonary hypertension and restores hypoxic pulmonary vasoconstriction in chronically hypoxic rats. *Circulation* **107**, 2037–2044 <https://doi.org/10.1161/01.CIR.0000062688.76508.B3>
- Pousada, G., Baloira, A., Vilaríño, C., Cifrián, J.M. and Valverde, D. (2014) Novel mutations in *BMPR2*, *ACVRL1* and *KCNA5* genes and hemodynamic parameters in patients with pulmonary arterial hypertension. *PLoS ONE* **9**, e100261 <https://doi.org/10.1371/journal.pone.0100261>
- Remillard C, V., Tigno, D.D., Platoshyn, O., Burg, E.D., Brevnova, E.E., Conger, D. et al. (2007) Function of *Kv1.5* channels and genetic variations of *KCNA5* in patients with idiopathic pulmonary arterial hypertension. *Am. J. Physiol. Cell Physiol.* **292**, 1837–1853 <https://doi.org/10.1152/ajpcell.00405.2006>
- Liu, X., Mei, M., Chen, X., Lu, Y., Dong, X., Hu, L. et al. (2019) Identification of genetic factors underlying persistent pulmonary hypertension of newborns in a cohort of Chinese neonates. *Respir. Res.* **20**, 174 <https://doi.org/10.1186/s12931-019-1148-1>
- Earley, S. and Brayden, J.E. (2015) Transient receptor potential channels in the vasculature. *Physiol. Rev.* **95**, 645–690 <https://doi.org/10.1152/physrev.00026.2014>
- Fernandez, R.A., Wan, J., Song, S., Smith, K.A., Gu, Y., Tauseef, M. et al. (2015) Upregulated expression of *STIM2*, *TRPC6*, and *ora12* contributes to the transition of pulmonary arterial smooth muscle cells from a contractile to proliferative phenotype. *Am. J. Physiol. Cell Physiol.* **308**, C581–C593 <https://doi.org/10.1152/ajpcell.00202.2014>
- Malczyk, M., Erb, A., Veith, C., Ghofrani, H.A., Schermuly, R.T., Gudermann, T. et al. (2017) The role of transient receptor potential channel 6 channels in the pulmonary vasculature. *Front. Immunol.* **8**, 1–11 <https://doi.org/10.3389/fimmu.2017.00707>
- Yu, Y., Keller, S.H., Remillard C, V., Safrina, O., Nicholson, A., Zhang, S.L. et al. (2009) A functional single-nucleotide polymorphism in the *TRPC6* gene promoter associated with idiopathic pulmonary arterial hypertension. *Circulation* **119**, 2313–2322 <https://doi.org/10.1161/CIRCULATIONAHA.108.782458>



- 24 Southgate, L., Machado, R.D., Gräf, S. and Morrell, N.W. (2020) Molecular genetic framework underlying pulmonary arterial hypertension. *Nat. Rev. Cardiol.* **17**, 85–95 <https://doi.org/10.1038/s41569-019-0242-x>
- 25 Hautefort, A., Mendes-Ferreira, P., Sabourin, J., Manaud, G., Bertero, T., Rucker-Martin, C. et al. (2019) Bmpr2 mutant rats develop pulmonary and cardiac characteristics of pulmonary arterial hypertension. *Circulation* **139**, 932–948 <https://doi.org/10.1161/CIRCULATIONAHA.118.033744>
- 26 Fantozzi, I., Platoshyn, O., Wong, A.H., Zhang, S., Remillard C, V., Furtado, M.R. et al. (2006) Bone morphogenetic protein-2 upregulates expression and function of voltage-gated K<sup>+</sup> channels in human pulmonary artery smooth muscle cells. *Am. J. Physiol. Lung Cell. Mol. Physiol.* **291**, L993–L1004 <https://doi.org/10.1152/ajplung.00191.2005>
- 27 Young, K.A., Ivester, C., West, J., Carr, M. and Rodman, D.M. (2006) BMP signaling controls PASMCMV channel expression in vitro and in vivo. *Am. J. Physiol. Lung Cell. Mol. Physiol.* **290**, L841–L848 <https://doi.org/10.1152/ajplung.00158.2005>
- 28 Pousada, G., Balóira, A. and Valverde, D. (2016) Complex inheritance in pulmonary arterial hypertension patients with several mutations. *Sci. Rep.* **6**, 33570 <https://doi.org/10.1038/srep33570>
- 29 Bohnen, M.S., Ma, L., Zhu, N., Qi, H., McClenaghan, C., Gonzaga-Jauregui, C. et al. (2018) Loss-of-function ABCC8 mutations in pulmonary arterial hypertension. *Circ. Genomic Precis. Med.* **11**, e002087 <https://doi.org/10.1161/CIRCGEN.118.002087>
- 30 Yu, P.B., Beppu, H., Kawai, N., Li, E. and Blocht, K.D. (2005) Bone morphogenetic protein (BMP) type II receptor deletion reveals BMP ligand-specific gain of signaling in pulmonary artery smooth muscle cells. *J. Biol. Chem.* **280**, 24443–24450 <https://doi.org/10.1074/jbc.M502825200>
- 31 Derynck, R. and Zhang, Y.E. (2003) Smad-dependent and Smad-independent pathways in TGF- $\beta$  family signalling. *Nature* **425**, 577–584 <https://doi.org/10.1038/nature02006>
- 32 Zhang, Y., Lu, W., Yang, K., Xu, L., Lai, N., Tian, L. et al. (2013) Bone morphogenetic protein 2 decreases TRPC expression, store-operated Ca<sup>2+</sup> entry, and basal [Ca<sup>2+</sup>]<sub>i</sub> in rat distal pulmonary arterial smooth muscle cells. *Am. J. Physiol. Cell Physiol.* **304**, 833–843 <https://doi.org/10.1152/ajpcell.00036.2012>
- 33 Zhang, Y., Wang, Y., Yang, K., Tian, L., Fu, X., Wang, Y. et al. (2014) BMP4 increases the expression of TRPC and basal [Ca<sup>2+</sup>]<sub>i</sub> via the p38MAPK and ERK1/2 pathways independent of BMPRII in PASCs. *PLoS ONE* **9**, e112695
- 34 Yang, X., Long, L., Southwood, M., Rudarakanchana, N., Upton, P.D., Jeffery, T.K. et al. (2005) Dysfunctional Smad signaling contributes to abnormal smooth muscle cell proliferation in familial pulmonary arterial hypertension. *Circ. Res.* **96**, 1053–1063 <https://doi.org/10.1161/01.RES.0000166926.54293.68>
- 35 Dewachter, L., Adnot, S., Guignabert, C., Tu, L., Marcos, E., Fadel, E. et al. (2009) Bone morphogenetic protein signalling in heritable versus idiopathic pulmonary hypertension. *Eur. Respir. J.* **34**, 1100–1110 <https://doi.org/10.1183/09031936.00183008>
- 36 Schach, C., Firth, A.L., Xu, M., Remillard C, V., Patel, H.H., Insel, P.A. et al. (2008) REGULATION OF PULMONARY VASOCONSTRICTION BY AGONISTS AND CAVEOLAE. *Exp. Lung Res.* **34**, 195–208 <https://doi.org/10.1080/01902140801925471>
- 37 Austin, E.D., Ma, L., LeDuc, C., Rosenzweig, E.B., Borczuk, A., Phillips, J.A. et al. (2012) Whole exome sequencing to identify a novel gene (Caveolin-1) associated with human pulmonary arterial hypertension. *Circ. Cardiovasc. Genet.* **5**, 336–343 <https://doi.org/10.1161/CIRCGENETICS.111.961888>
- 38 Maniatis, N.A., Shinin, V., Schraufnagel, D.E., Okada, S., Vogel, S.M., Malik, A.B. et al. (2008) Increased pulmonary vascular resistance and defective pulmonary artery filling in caveolin-1<sup>-/-</sup> mice. *Am. J. Physiol. Lung Cell. Mol. Physiol.* **294**, 865–873 <https://doi.org/10.1152/ajplung.00079.2007>
- 39 Huang, J., Wolk, J.H., Gewirtz, M.H. and Mathew, R. (2012) Caveolin-1 expression during the progression of pulmonary hypertension. *Exp. Biol. Med.* **237**, 956–965 <https://doi.org/10.1258/ebm.2012.011382>
- 40 Liu, J., Qu, C., Li, H., Zhang, Y., Sun, J., Yang, S. et al. (2016) Expression of KCNA5 protein in human mammary epithelial cell line associated with caveolin-1. *J. Membr. Biol.* **249**, 449–457 <https://doi.org/10.1007/s00232-016-9885-2>
- 41 Davies, L.M., Purves, G.I., Barrett-Jolley, R. and Dart, C. (2010) Interaction with caveolin-1 modulates vascular ATP-sensitive potassium (KATP) channel activity. *J. Physiol.* **588**, 3255–3266 <https://doi.org/10.1113/jphysiol.2010.194779>
- 42 Kang, C., Hernandez, V.A. and Hu, K. (2017) Functional interaction of the two-pore domain potassium channel TASK-1 and caveolin-3. *Biochim. Biophys. Acta Mol. Cell Res.* **1864**, 1537–1544 <https://doi.org/10.1016/j.bbamcr.2017.06.016>
- 43 Murata, T., Lin, M.I., Stan R, V., Bauer, P.M., Yu, J. and Sessa, W.C. (2007) Genetic evidence supporting caveolae microdomain regulation of calcium entry in endothelial cells. *J. Biol. Chem.* **282**, 16631–16643 <https://doi.org/10.1074/jbc.M607948200>
- 44 Jiao, H.X., Mu, Y.P., Gui, L.X., Yan, F.R., Lin, D.C., Sham, J.S.K. et al. (2016) Increase in caveolae and caveolin-1 expression modulates agonist-induced contraction and store- and receptor-operated Ca<sup>2+</sup> entry in pulmonary arteries of pulmonary hypertensive rats. *Vascul. Pharmacol.* **84**, 55–66 <https://doi.org/10.1016/j.vph.2016.06.004>
- 45 Morris, H.E., Neves, K.B., Montezano, A.C., MacLean, M.R. and Touyz, R.M. (2019) Notch3 signalling and vascular remodelling in pulmonary arterial hypertension. *Clin. Sci.* **133**, 2481–2498 <https://doi.org/10.1042/CS20190835>
- 46 Chida, A., Shintani, M., Matsushita, Y., Sato, H., Eitoku, T., Nakayama, T. et al. (2014) Mutations of notch3 in childhood pulmonary arterial hypertension. *Mol. Genet. Genomic Med.* **2**, 229–239 <https://doi.org/10.1002/mgg3.58>
- 47 Li, X., Zhang, X., Leathers, R., Makino, A., Huang, C., Parsa, P. et al. (2009) Notch3 signaling promotes the development of pulmonary arterial hypertension. *Nat. Med.* **15**, 1289–1297 <https://doi.org/10.1038/nm.2021>
- 48 Yao, J., Fang, X., Zhang, C., Yang, Y., Wang, D., Chen, Q. et al. (2021) Astragaloside IV attenuates hypoxia-induced pulmonary vascular remodeling via the Notch signaling pathway. *Mol. Med. Rep.* **23**, 89 <https://doi.org/10.3892/mmr.2020.11726>
- 49 Song, S., Babicheva, A., Zhao, T., Ayon, R.J., Rodriguez, M., Rahimi, S. et al. (2020) Notch enhances Ca<sup>2+</sup> entry by activating calcium-sensing receptors and inhibiting voltage-gated K<sup>+</sup> channels. *Am. J. Physiol. Cell Physiol.* **318**, C954–C968 <https://doi.org/10.1152/ajpcell.00487.2019>
- 50 Lv, Y., Fu, L., Zhang, Z., Gu, W., Luo, X., Zhong, Y. et al. (2019) Increased expression of microRNA-206 inhibits potassium voltage-gated channel subfamily a member 5 in pulmonary arterial smooth muscle cells and is related to exaggerated pulmonary artery hypertension following intrauterine growth retardation in rats. *J. Am. Heart Assoc.* **8**, e010456 <https://doi.org/10.1161/JAHA.118.010456>
- 51 Babicheva, A., Ayon, R.J., Zhao, T., Ek Vitorin, J.F., Pohl, N.M., Yamamura, A. et al. (2020) MicroRNA-mediated downregulation of K<sup>+</sup> channels in pulmonary arterial hypertension. *Am. J. Physiol. Lung Cell. Mol. Physiol.* **318**, L10–L26 <https://doi.org/10.1152/ajplung.00010.2019>
- 52 Le Ribez, H., Courboulin, A., Ghigna, M., Lambert, M., Hautefort, A., Humbert, M. et al. (2020) In vivo miR-138-5p inhibition alleviates monocrotaline-induced pulmonary hypertension and normalizes pulmonary KCNK3 and SLC45A3 expression. *Respir. Res.* **21**, 186 <https://doi.org/10.1186/s12931-020-01444-7>

- 53 Liu, H.M., Jia, Y., Zhang, Y.X., Yan, J., Liao, N., Li, X.H. et al. (2019) Dysregulation of miR-135a-5p promotes the development of rat pulmonary arterial hypertension in vivo and in vitro. *Acta Pharmacol. Sin.* **40**, 477–485 <https://doi.org/10.1038/s41401-018-0076-9>
- 54 Correale, M., Palmiotti, G.A., Lo Storto, M.M., Montrone, D., Foschino Barbaro, M.P., Di Biase, M. et al. (2015) HIV-associated pulmonary arterial hypertension: from bedside to the future. *Eur. J. Clin. Invest.* **45**, 515–528 <https://doi.org/10.1111/eci.12427>
- 55 Lund, A.K., Lucero, J.A., Herbert, L., Liu, Y. and Naik, J.S. (2011) Human immunodeficiency virus transgenic rats exhibit pulmonary hypertension. *Am. J. Physiol. Lung Cell. Mol. Physiol.* **301**, L315–L326 <https://doi.org/10.1152/ajplung.00045.2011>
- 56 Tarantelli, R.A., Schweitzer, F., Simon, M.A., Vanderpool, R.R., Christman, I., Rayens, E. et al. (2018) Longitudinal evaluation of pulmonary arterial hypertension in a rhesus macaque (*Macaca mulatta*) model of HIV infection. *Comp. Med.* **68**, 461–473 <https://doi.org/10.30802/AALAS-CM-18-000012>
- 57 Mondejar-Parreño, G., Morales-Cano, D., Barreira, B., Callejo, M., Ruiz-Cabello, X.J., Moreno, L. et al. (2018) HIV transgene expression impairs K<sup>+</sup> channel function in the pulmonary vasculature. *Am. J. Physiol. Lung Cell. Mol. Physiol.* **315**, L711–L723 <https://doi.org/10.1152/ajplung.00045.2018>
- 58 Hsu, K., Seharaseyon, J., Dong, P., Bour, S. and Marbán, E. (2004) Mutual functional destruction of HIV-1 Vpu and host TASK-1 channel. *Mol. Cell.* **14**, 259–267 [https://doi.org/10.1016/S1097-2765\(04\)00183-2](https://doi.org/10.1016/S1097-2765(04)00183-2)
- 59 Veit, F., Pak, O., Brandes, R.P. and Weissmann, N. (2015) Hypoxia-dependent reactive oxygen species signaling in the pulmonary circulation: focus on ion channels. *Antioxidants Redox Signal.* **22**, 537–552 <https://doi.org/10.1089/ars.2014.6234>
- 60 Firth, A.L., Platoshyn, O., Brevnova, E.E., Burg, E.D., Powell, F., Haddad, G.H. et al. (2009) Hypoxia selectively inhibits KCNA5 channels in pulmonary artery smooth muscle cells. *Ann. N. Y. Acad. Sci.* **1177**, 101–111 <https://doi.org/10.1111/j.1749-6632.2009.05040.x>
- 61 Smith, K.A. and Schumacker, P.T. (2019) Sensors and signals: the role of reactive oxygen species in hypoxic pulmonary vasoconstriction. *J. Physiol.* **597**, 1033–1043 <https://doi.org/10.1113/JP275852>
- 62 Dunham-Snary, K.J., Hong, Z.G., Xiong, P.Y., Del Paggio, J.C., Herr, J.E., Johri, A.M. et al. (2016) A mitochondrial redox oxygen sensor in the pulmonary vasculature and ductus arteriosus. *Pflugers Arch. Eur. J. Physiol.* **468**, 43–58 <https://doi.org/10.1007/s00424-015-1736-y>
- 63 Mittal, M., Gu, X.Q., Pak, O., Pamerter, M.E., Haag, D., Fuchs, D.B. et al. (2012) Hypoxia induces K<sup>v</sup> channel current inhibition by increased NADPH oxidase-derived reactive oxygen species. *Free Radic. Biol. Med.* **52**, 1033–1042 <https://doi.org/10.1016/j.freeradbiomed.2011.12.004>
- 64 Buckler, K.J. (2015) TASK channels in arterial chemoreceptors and their role in oxygen and acid sensing. *Pflugers Arch. Eur. J. Physiol.* **467**, 1013–1025 <https://doi.org/10.1007/s00424-015-1689-1>
- 65 Nagaraj, C., Tang, B., Bálint, Z., Wygrecka, M., Hrzniak, A., Kwapiszewska, G. et al. (2013) Src tyrosine kinase is crucial for potassium channel function in human pulmonary arteries. *Eur. Respir. J.* **41**, 85–95 <https://doi.org/10.1183/09031936.00211811>
- 66 Han, L., Song, N., Hu, X., Zhu, A., Wei, X., Liu, J. et al. (2020) Inhibition of RELM-β prevents hypoxia-induced overproliferation of human pulmonary artery smooth muscle cells by reversing PLC-mediated KCNK3 decline. *Life Sci.* **246**, 117419 <https://doi.org/10.1016/j.lfs.2020.117419>
- 67 Reyes R, V., Castillo-Galán, S., Hernandez, I., Herrera, E.A., Ebersperger, G. and Llanos, A.J. (2018) Revisiting the role of TRP, ora1, and ASIC channels in the pulmonary arterial response to hypoxia. *Front. Physiol.* **9**, 486 <https://doi.org/10.3389/fphys.2018.00486>
- 68 Malczyk, M., Veith, C., Schermuly, R.T., Gudermann, T., Dietrich, A., Sommer, N. et al. (2016) NADPH oxidases—do they play a role in TRPC regulation under hypoxia? *Pflugers Arch. Eur. J. Physiol.* **468**, 23–41 <https://doi.org/10.1007/s00424-015-1731-3>
- 69 Chen, T.X., Xu, X.Y., Zhao, Z., Zhao, F.Y., Gao, Y.M., Yan, X.H. et al. (2017) Hydrogen peroxide is a critical regulator of the hypoxia-induced alterations of store-operated Ca<sup>2+</sup> entry into rat pulmonary arterial smooth muscle cells. *Am. J. Physiol. Lung Cell. Mol. Physiol.* **312**, L477–L487 <https://doi.org/10.1152/ajplung.00138.2016>
- 70 Veith, C., Schermuly, R.T., Brandes, R.P. and Weissmann, N. (2016) Molecular mechanisms of hypoxia-inducible factor-induced pulmonary arterial smooth muscle cell alterations in pulmonary hypertension. *J. Physiol.* **594**, 1167–1177 <https://doi.org/10.1113/JP270689>
- 71 Wang, J., Weigand, L., Wang, W., Sylvester, J.T. and Shimoda, L.A. (2005) Chronic hypoxia inhibits K<sub>v</sub> channel gene expression in rat distal pulmonary artery. *Am. J. Physiol. Lung Cell. Mol. Physiol.* **288**, 1049–1058 <https://doi.org/10.1152/ajplung.00379.2004>
- 72 Bonnet, S., Michelakis, E.D., Porter, C.J., Andrade-Navarro, M.A., Thébaud, B., Bonnet, S. et al. (2006) An abnormal mitochondrial-hypoxia inducible factor-1α-K<sub>v</sub> channel pathway disrupts oxygen sensing and triggers pulmonary arterial hypertension in fawn hooded rats: similarities to human pulmonary arterial hypertension. *Circulation* **113**, 2630–2641 <https://doi.org/10.1161/CIRCULATIONAHA.105.609008>
- 73 Nagaraj, C., Tang, B., Nagy, B., Papp, R., Jain, P., Marsh, L. et al. (2016) Docosahexaenoic acid causes rapid pulmonary arterial relaxation via K<sub>Ca</sub> channel-mediated hyperpolarisation in pulmonary hypertension. *Eur. Respir. J.* **48**, 1127–1136 <https://doi.org/10.1183/13993003.01814-2015>
- 74 Barnes, E.A., Lee, L., Barnes, S.L., Brenner, R., Alvira, C.M. and Cornfield, D.N. (2018) β1-Subunit of the calcium-sensitive potassium channel modulates the pulmonary vascular smooth muscle cell response to hypoxia. *Am. J. Physiol. Lung Cell. Mol. Physiol.* **315**, L265–L275 <https://doi.org/10.1152/ajplung.00060.2018>
- 75 Smith, K.A., Voiriot, G., Tang, H., Fraidenburg, D.R., Song, S., Yamamura, H. et al. (2015) Notch activation of Ca<sup>2+</sup> signaling in the development of hypoxic pulmonary vasoconstriction and pulmonary hypertension. *Am. J. Respir. Cell Mol. Biol.* **53**, 355–367 <https://doi.org/10.1165/rcmb.2014-02350C>
- 76 Wang, X.Y., Mo, D., Tian, W., Liu, X.X., Zhou, Y.G., Sun, Y. et al. (2019) Inhibition of RhoA/ROCK signaling pathway ameliorates hypoxic pulmonary hypertension via HIF-1α-dependent functional TRPC channels. *Toxicol. Appl. Pharmacol.* **369**, 60–72 <https://doi.org/10.1016/j.taap.2019.02.017>
- 77 Parpaite, T., Cardouat, G., Mauroux, M., Gillibert-Duplantier, J., Robillard, P., Quignard, J.F. et al. (2016) Effect of hypoxia on TRPV1 and TRPV4 channels in rat pulmonary arterial smooth muscle cells. *Pflugers Arch. Eur. J. Physiol.* **468**, 111–130 <https://doi.org/10.1007/s00424-015-1704-6>
- 78 Plomaritas, D.R., Herbert, L.M., Yellowhair, T.R., Resta, T.C., Bosc, L.V.G., Walker, B.R. et al. (2014) Chronic hypoxia limits H<sub>2</sub>O<sub>2</sub>-induced inhibition of ASIC1-dependent store-operated calcium entry in pulmonary arterial smooth muscle. *Am. J. Physiol. Lung Cell. Mol. Physiol.* **307**, L419–L430 <https://doi.org/10.1152/ajplung.00095.2014>
- 79 Bonnet, S., Rochefort, G., Sutendra, G., Archer, S.L., Haromy, A., Webster, L. et al. (2007) The nuclear factor of activated T cells in pulmonary arterial hypertension can be therapeutically targeted. *Proc. Natl Acad. Sci. U.S.A.* **104**, 11418–11423 <https://doi.org/10.1073/pnas.0610467104>
- 80 Orcholski, M.E., Yuan, K., Rajasingh, C., Tsai, H., Shamskhov, E.A., Dhillon, N.K. et al. (2018) Drug-induced pulmonary arterial hypertension: a primer for clinicians and scientists. *Am. J. Physiol. Lung Cell. Mol. Physiol.* **314**, L967–L983 <https://doi.org/10.1152/ajplung.00553.2017>
- 81 MacLean, M.R.M. (2018) The serotonin hypothesis in pulmonary hypertension revisited: targets for novel therapies (2017 Grover conference series). *Pulm. Circ.* **8**, 2045894018759125 <https://doi.org/10.1177/2045894018759125>

- 82 Guignabert, C., Izikki, M., Tu, L.I., Li, Z., Zadigue, P., Barlier-Mur, A.M. et al. (2006) Transgenic mice overexpressing the 5-hydroxytryptamine transporter gene in smooth muscle develop pulmonary hypertension. *Circ. Res.* **98**, 1323–1330 <https://doi.org/10.1161/01.RES.0000222546.45372.a0>
- 83 Jiao, Y.R., Wang, W., Lei, P.C., Jia, H.P., Dong, J., Gou, Y.Q. et al. (2019) 5-HTT, BMPR2, EDN1, ENG, KCNA5 gene polymorphisms and susceptibility to pulmonary arterial hypertension: a meta-analysis. *Gene* **680**, 34–42 <https://doi.org/10.1016/j.gene.2018.09.020>
- 84 Ducret, T., Guibert, C., Marthan, R. and Savineau, J.P. (2008) Serotonin-induced activation of TRPV4-like current in rat intrapulmonary arterial smooth muscle cells. *Cell Calcium* **43**, 315–323 <https://doi.org/10.1016/j.ceca.2007.05.018>
- 85 Han, J., Tian, H., Liu, Y. and Fan, F. (2019) Sarpogrelate attenuates pulmonary arterial hypertension via calcium/calcineurin axis. *Front. Biosci.* **24**, 607–615 <https://doi.org/10.2741/4739>
- 86 Sung, D.J., Noh, H.J., Kim, J.G., Park, S.W., Kim, B., Cho, H. et al. (2013) Serotonin contracts the rat mesenteric artery by inhibiting 4-aminopyridine-sensitive Kv channels via the 5-HT<sub>2A</sub> receptor and Src tyrosine kinase. *Exp. Mol. Med.* **45**, e67 <https://doi.org/10.1038/emm.2013.116>
- 87 Genet, N., Billaud, M., Rossignol, R., Dubois, M., Gillibert-Duplantier, J., Isakson, B.E. et al. (2017) Signaling pathways linked to serotonin-induced superoxide anion production: a physiological role for mitochondria in pulmonary arteries. *Front. Physiol.* **8**, 76 <https://doi.org/10.3389/fphys.2017.00076>
- 88 Cogolludo, A., Moreno, L., Lodi, F., Frazziano, G., Cobeño, L., Tamargo, J. et al. (2006) Serotonin inhibits voltage-gated K<sup>+</sup> currents in pulmonary artery smooth muscle cells: role of 5-HT<sub>2A</sub> receptors, caveolin-1, and KV1.5 channel internalization. *Circ. Res.* **98**, 931–938 <https://doi.org/10.1161/01.RES.0000216858.04599.e1>
- 89 Kurakula, K., Smolders, V.F.E.D., Tura-Ceide, O., Wouter Jukema, J., Quax, P.H.A. and Goumans, M.J. (2021) Endothelial dysfunction in pulmonary hypertension: cause or consequence? *Biomedicines* **9**, 57 <https://doi.org/10.3390/biomedicines9010057>
- 90 Manoury, B., Idres, S., Leblais, V. and Fischmeister, R. (2020) Ion channels as effectors of cyclic nucleotide pathways: functional relevance for arterial tone regulation. *Pharmacol. Ther.* **209**, 107499 <https://doi.org/10.1016/j.pharmthera.2020.107499>
- 91 Inoue, M., Matsuoka, H., Harada, K., Mugishima, G. and Kameyama, M. (2020) TASK channels: channelopathies, trafficking, and receptor-mediated inhibition. *Pflugers Arch. Eur. J. Physiol.* **472**, 911–922 <https://doi.org/10.1007/s00424-020-02403-3>
- 92 Seyler, C., Duthil-Straub, E., Zitron, E., Gierten, J., Scholz, E.P., Fink, R.H.A. et al. (2012) TASK1 (K 2P3.1) K<sup>+</sup> channel inhibition by endothelin-1 is mediated through Rho kinase-dependent phosphorylation. *Br. J. Pharmacol.* **165**, 1467–1475 <https://doi.org/10.1111/j.1476-5381.2011.01626.x>
- 93 Cunningham, K.P., Holden, R.G., Escribano-Subias, P.M., Cogolludo, A., Veale, E.L. and Mathie, A. (2019) Characterization and regulation of wild-type and mutant TASK-1 two pore domain potassium channels indicated in pulmonary arterial hypertension. *J. Physiol.* **597**, 1087–1101 <https://doi.org/10.1113/JP277275>
- 94 Olschewski, A., Li, Y., Tang, B., Hanze, J., Eul, B., Bohle, R.M. et al. (2006) Impact of TASK-1 in human pulmonary artery smooth muscle cells. *Circ. Res.* **98**, 1072–1080 <https://doi.org/10.1161/01.RES.0000219677.12988.e9>
- 95 Callejo, M., Mondejar-Parreño, G., Morales-Cano, D., Barreira, B., Esquivel-Ruiz, S., Olivencia, M.A. et al. (2020) Vitamin D deficiency downregulates TASK-1 channels and induces pulmonary vascular dysfunction. *Am. J. Physiol. Lung Cell. Mol. Physiol.* **319**, L627–L640 <https://doi.org/10.1152/ajplung.00475.2019>
- 96 Mondéjar-Parreño, G., Barreira, B., Callejo, M., Morales-Cano, D., Barrese, V., Esquivel-Ruiz, S. et al. (2020) Uncovered contribution of Kv7 channels to pulmonary vascular tone in pulmonary arterial hypertension. *Hypertension* **76**, 1134–1146 <https://doi.org/10.1161/HYPERTENSIONAHA.120.15221>
- 97 Liao, J., Lu, W., Chen, Y., Duan, X., Zhang, C., Luo, X. et al. (2021) Upregulation of Piezo1 (Piezo type mechanosensitive ion channel component 1) enhances the intracellular free calcium in pulmonary arterial smooth muscle cells from idiopathic pulmonary arterial hypertension patients. *Hypertension* **77**, 1974–1989 <https://doi.org/10.1161/HYPERTENSIONAHA.120.16629>
- 98 Papp, R., Nagaraj, C., Zabini, D., Nagy, B.M., Lengyel, M., Skofic Maurer, D. et al. (2019) Targeting TMEM16A to reverse vasoconstriction and remodelling in idiopathic pulmonary arterial hypertension. *Eur. Respir. J.* **53**, 1800965 <https://doi.org/10.1183/13993003.00965-2018>
- 99 Ferraz, A.P., Seara, F.A.C., Baptista, E.F., Barencio, T.S., Sottani, T.B.B., Souza, N.S.C. et al. (2021) BKCa channel activation attenuates the pathophysiological progression of monocrotaline-induced pulmonary arterial hypertension in Wistar rats. *Cardiovasc. Drugs Ther.* **35**, 719–732 <https://doi.org/10.1007/s10557-020-07115-5>
- 100 Chen, Y., Lu, W., Yang, K., Duan, X., Li, M., Chen, X. et al. (2020) Tetramethylpyrazine: a promising drug for the treatment of pulmonary hypertension. *Br. J. Pharmacol.* **177**, 2743–2764 <https://doi.org/10.1111/bph.15000>
